# Supplementary material
Source: HighWire-hosted journal article supplement (https://bmjopen.bmj.com/content/14/11/e080252)
Supplement: inline-supplementary-material-1 [file inline-supplementary-material-1.pdf]

Annex: 1 Questionnaires

Part I: Socio-Demographic Characteristics of Respondents

Instruction: Please circle the number of your choice.

| It. no. | Questions                                                     | Responses                                                                        | Remark |
|---------|---------------------------------------------------------------|----------------------------------------------------------------------------------|--------|
| 101     | Sex of participants                                           | 1. Male      2. Female                                                           |        |
| 102     | How old are you?                                              | -----years                                                                       |        |
| 103     | What is your ethnicity                                        | 1. Amhara    2. Oromo<br>3.Tigre      4.Others_____                              |        |
| 104     | What is your marital status?                                  | 1. Married    2. Single<br>3. Divorced   4. Widowed                              |        |
| 105     | What is your religion?                                        | 1. Orthodox   2. Muslim<br>3. Protestant   4. Catholic<br>5.Others(specify)_____ |        |
| 106     | What is your level of qualification?                          | 1. Diploma   2. Bachelor degree<br>3. Master’s degree and above                  |        |
| 107     | How many years of work<br><br>What experience do you have?    | 1. _____                                                                         |        |
| 108     | How long have you been<br><br>working in a postoperative area | 1. _____                                                                         |        |
| 109     | Where is your current area of Practice?                       | 1. _____                                                                         |        |

|     |                                                                         |                                                        |                           |
|-----|-------------------------------------------------------------------------|--------------------------------------------------------|---------------------------|
| 110 | Have you received any training related to POP management?               | 1. Yes<br>2. No                                        | If No<br><br>Skip to Q12  |
| 111 | If yes, How do you receive training?                                    | 1. Lecture    2. Course<br>3. Conference   4. Workshop |                           |
| 112 | Do you have access to read pain management guidelines in your hospital? | 1. Yes<br>2. No                                        | If No<br><br>Skip to next |
| 113 | If yes, How often do you read the guidelines?                           | 1 Always   2 Monthly<br>3 Quarterly   4 Yearly         |                           |

## Part II: Respondents' knowledge of Post-operative pain assessment and management-related questions

**Instruction: Please circle the number of your choice.**

| Item No. | Items                                                                                                                                           | Response                       |
|----------|-------------------------------------------------------------------------------------------------------------------------------------------------|--------------------------------|
| 201      | When a patient requests increasing amounts of analgesics to control pain, this usually indicates that the patient is psychologically dependent. | 1. Yes<br>2. No<br>3. not sure |
| 202      | Vital signs are always reliable indicators of the intensity of a patient's pain.                                                                | 1. Yes<br>2. No                |

|     |                                                                                                                                                       |                                |
|-----|-------------------------------------------------------------------------------------------------------------------------------------------------------|--------------------------------|
|     |                                                                                                                                                       | 3. not sure                    |
| 203 | Pain assessment includes onset, duration, variability, location, and intensity of pain.                                                               | 1. Yes<br>2. No<br>3. not sure |
| 204 | When using the WHO pain ladder to treat acute pain, treatment should go from bottom to top.                                                           | 1. Yes<br>2. No<br>3. not sure |
| 205 | Combining analgesics that work by different mechanisms may result in better pain control with fewer side effects than using a single analgesic agents | 1. Yes<br>2. No<br>3. not sure |
| 206 | Pain should be assessed before and after administering pain medications.                                                                              | 1. Yes<br>2. No<br>3. not sure |
| 207 | Observation is one part of the method used in surgical pain assessment                                                                                | 1. Yes<br>2. No<br>3. not sure |
| 208 | The side effects of narcotics should be observed at least 20 minutes after Administration                                                             | 1. Yes<br>2. No<br>3. not sure |
| 209 | The recommended route of administration of opioid analgesics with brief, severe pain of sudden onset such as POP is intramuscular.                    | 1. Yes                         |

|      |                                                                                                                   |                                |
|------|-------------------------------------------------------------------------------------------------------------------|--------------------------------|
|      |                                                                                                                   | 2. No<br>3. not sure           |
| 210  | Analgesics for POP should initially be given around the clock on a fixed schedule.                                | 1. Yes<br>2. No<br>3. not sure |
| 211  | Pre-surgery injection such as anesthesia is given for pain management                                             | 1. Yes<br>2. No<br>3. not sure |
| 212  | Respiratory depression rarely occurs in patients who have been receiving stable doses of Opioids over months.     | 1. Yes<br>2. No<br>3. not sure |
| 2013 | Opioids should not be used in patients with a history of substance abuse.                                         | 1. Yes<br>2. No<br>3. not sure |
| 214  | A rating scale ranging from (0) "no pain at all to (10) the worst pain" is essential to adopt in pain assessment. | 1. Yes<br>2. No<br>3. not sure |
| 215  | If a patient sleeps with no movement postoperatively, this indicates that the patient is not in pain.             | 1. Yes<br>2. No<br>3. not sure |

### Part III: Respondents' attitude toward Post-operative pain assessment and management-related questions Instruction:

Please click the box you choose

| Item<br>S.No. | Questions                                                                                           | Response |              |               |
|---------------|-----------------------------------------------------------------------------------------------------|----------|--------------|---------------|
|               |                                                                                                     | Agree    | Dis<br>agree | Don't<br>know |
| 301           | Your patient should experience discomfort before giving the next dose of pain medications.          |          |              |               |
| 302           | Distraction can reduce pain intensity                                                               |          |              |               |
| 303           | A patient's spiritual beliefs may lead them to think pain and suffering are necessary.              |          |              |               |
| 304           | Using pain measurement instruments is integral in postoperative pain management.                    |          |              |               |
| 305           | Morphine is a very strong drug; patients in postoperative pain would be content with just one dose. |          |              |               |
| 306           | Nurses can best judge the patient's pain intensity because they spent 24 hours with the patients    |          |              |               |
| 307           | Lack of pain expression does not mean lack of pain.                                                 |          |              |               |
| 308           | Effective analgesia is an essential part of postoperative Management                                |          |              |               |
| 109           | Pain is what the patient says it is.                                                                |          |              |               |

### Part IV: Items to assess practice

**Direction:** Read the following questions carefully and encircle your choice. If your choice is "yes" tick also on how frequently you practice it and skip to the next questions if your choice is "never".

|     |                                                                                                                                               |                        |                                                                                                                                                                                                                                                   |
|-----|-----------------------------------------------------------------------------------------------------------------------------------------------|------------------------|---------------------------------------------------------------------------------------------------------------------------------------------------------------------------------------------------------------------------------------------------|
| 401 | Do you assess pain for patients able to communicate?<br><br>If your choice is never to skip to Q4                                             | 1. yes<br><br>2. never | If yes how frequently?<br><br>I always sometimes                                                                                                                                                                                                  |
| 402 | Do you use a pain assessment tool for the pain scale?<br><br>If never used go to Q404                                                         | 1. yes<br><br>2. never | If yes how frequently?<br><br>I always sometimes                                                                                                                                                                                                  |
| 403 | If use, Please! Name the tool(s) you used.                                                                                                    | _____, _____           |                                                                                                                                                                                                                                                   |
| 404 | If your answer for Q401 & 402 above is never, What Were the barriers that hindered you from pain assessment? You can choose multiple options. |                        | 1. Nursing workload<br>2. Lack of standard pain assessment tool in hospital<br>3. lack of training in pain management<br>4. Lack of pain management Guidelines in the hospital<br>5. Patient's inability to communicate<br>6. Other(specify)_____ |
| 405 | Do you encourage the use of transcutaneous electrical nerve stimulators for pain management                                                   | 1. yes<br><br>2. never | If yes how frequently?<br><br>I always sometimes                                                                                                                                                                                                  |
| 406 | Do you combine opioids with NSAIDs rather than single analgesic agents when managing POP as suggested by the World Health Organization?       | 1. yes<br><br>2. never | If yes how frequently?<br><br>I always sometimes                                                                                                                                                                                                  |

|     |                                                                                                                                                                     |                    |                                                                                                                                                   |
|-----|---------------------------------------------------------------------------------------------------------------------------------------------------------------------|--------------------|---------------------------------------------------------------------------------------------------------------------------------------------------|
|     |                                                                                                                                                                     |                    |                                                                                                                                                   |
| 407 | Do you document the findings after the pain assessment?                                                                                                             | 1. yes<br>2. never | If yes how frequently?<br><br>always sometimes                                                                                                    |
| 408 | If your answer for Q407 is never, what was the reason for your not documenting the finding? If not choose never, go to Q409.<br><br>You can choose multiple options |                    | 1. Nursing workload<br><br>2. No designed area for charting<br><br>3. Lack of familiarity with the assessment tools<br><br>8. Other(specify)_____ |
| 409 | Do you encourage prayer by patients or religious leaders postoperatively?                                                                                           | 1. yes<br>2. never | If yes how frequently?<br><br>I always sometimes                                                                                                  |
| 410 | Do you administer ordered pain medication, around the clock (regularly) as ordered?                                                                                 | 1. yes<br>2. never | If yes how frequently?<br><br>I always sometimes                                                                                                  |
| 411 | Do you use music therapy to reduce postoperative pain?                                                                                                              | 1. yes<br>2. never | If yes how frequently?<br><br>always sometimes                                                                                                    |
| 412 | Do you reassess pain after giving pain medication to evaluate the effectiveness of pain medication?                                                                 | 1. yes<br>2. never | If yes how frequently?<br><br>I always sometimes                                                                                                  |
| 413 | After surgery, do you provide comfortable positions to help relieve pain?                                                                                           | 1. yes<br>2. never | If yes how frequently?<br><br>always sometimes                                                                                                    |
| 414 | Do you ask and help to support the painful areas when the patients moving or coughing after surgery?                                                                | 1. yes<br>2. never | If yes how frequently?<br><br>always sometimes                                                                                                    |

|     |                                                                                                |                    |                                              |
|-----|------------------------------------------------------------------------------------------------|--------------------|----------------------------------------------|
| 415 | Do you provide a clean, calm, and well-ventilated ward environment for POP management?         | 1. yes<br>2. never | If yes how frequently?<br>I always sometimes |
| 416 | Do you lay the patients on neat, well-laid beds postoperatively?                               | 1. yes<br>2. never | If yes how frequently?<br>always sometimes   |
| 417 | Do you encourage massaging and stretching to reduce POP?                                       | 1. yes<br>2. never | If yes how frequently?<br>always sometimes   |
| 418 | Do you apply heat and cold compresses to manage postoperative pain?                            | 1. yes<br>2. never | If yes how frequently?<br>I always sometimes |
| 419 | Do you encourage early ambulation/exercise with analgesia?                                     | 1. yes<br>2. never | If yes how frequently?<br>I always sometimes |
| 420 | Do you encourage the use of acupuncture?                                                       | 1. yes<br>2. never | If yes how frequently?<br>I always sometimes |
| 421 | Do you use patient distraction, relaxation, and guided imagery postoperatively to reduce pain? | 1. yes<br>2. never | If yes how frequently?<br>I always sometimes |
| 422 | Do you dress, bandage, splint, and reinforce wound sites postoperatively?                      | 1. yes<br>2. never | If yes how frequently?<br>I always sometimes |
